# Supplementary material
Source: PubMed Central journal article supplement (PMC5167160)

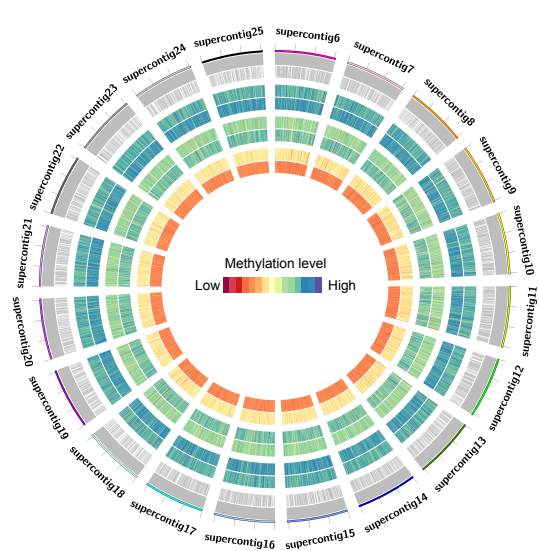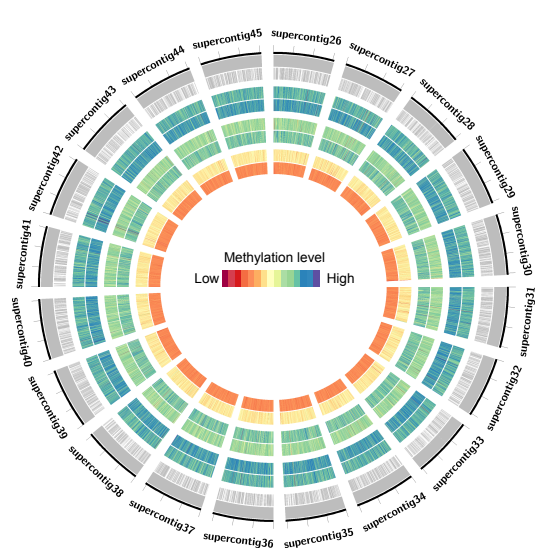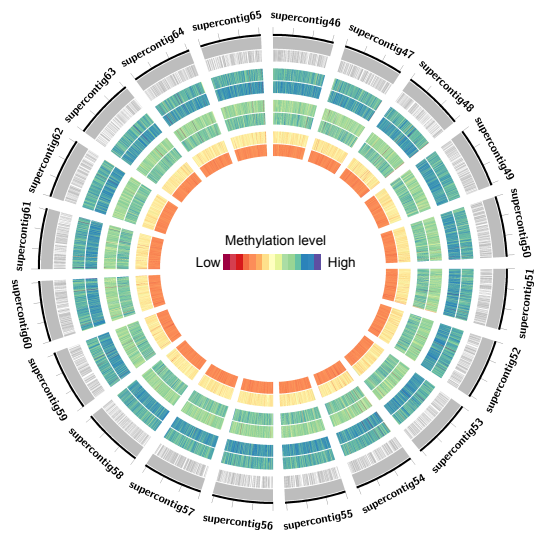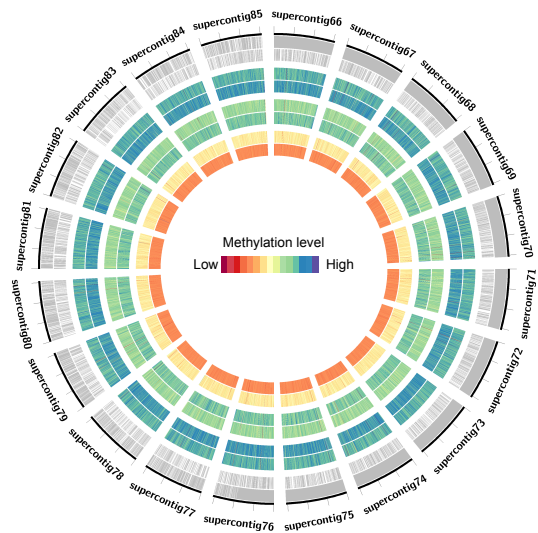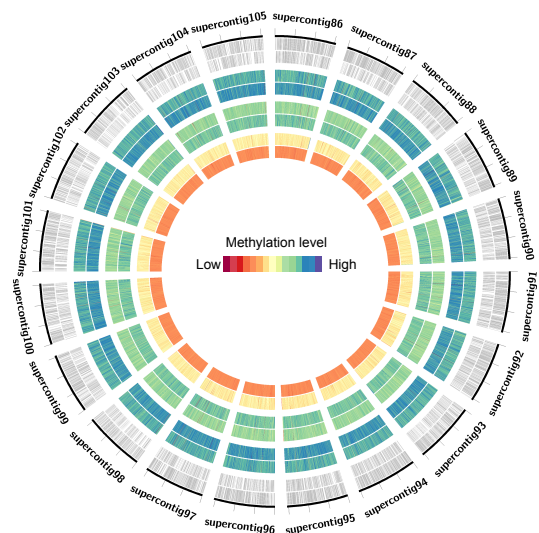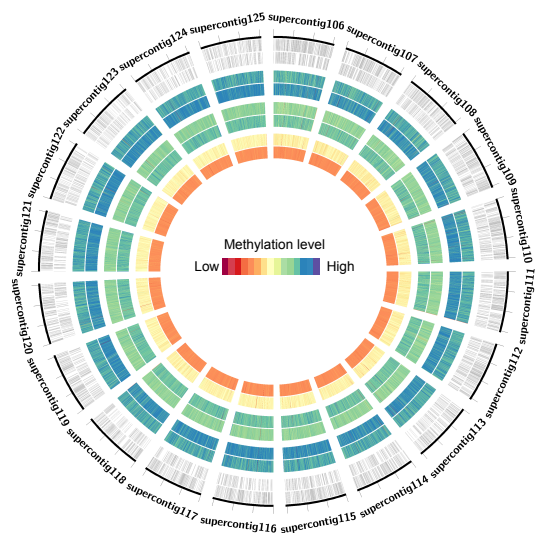

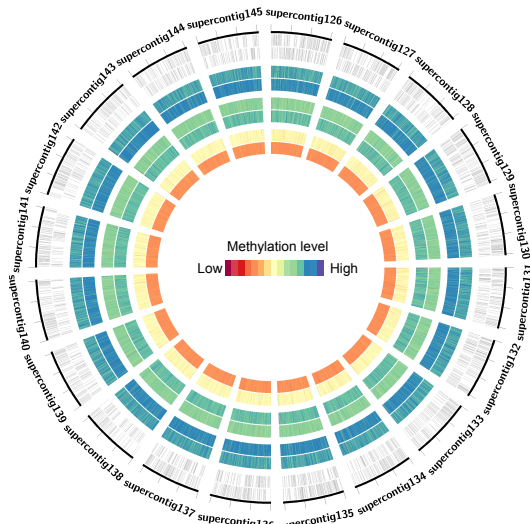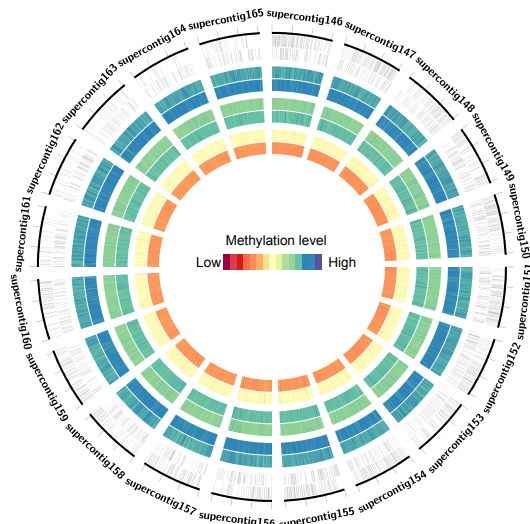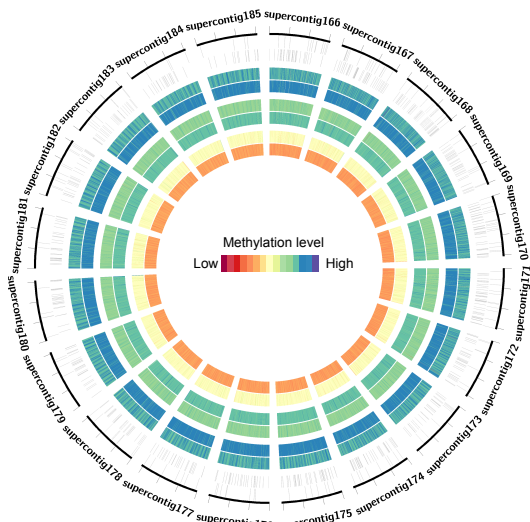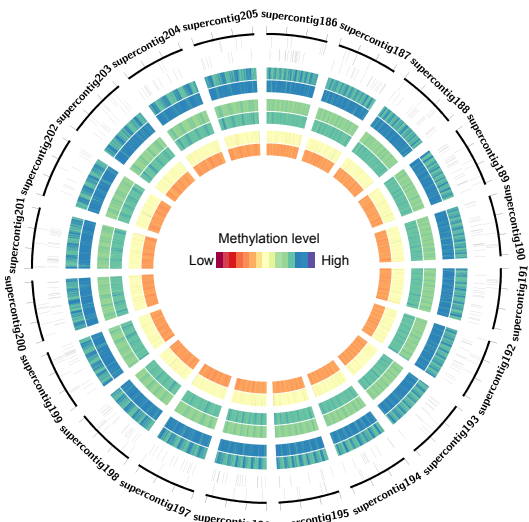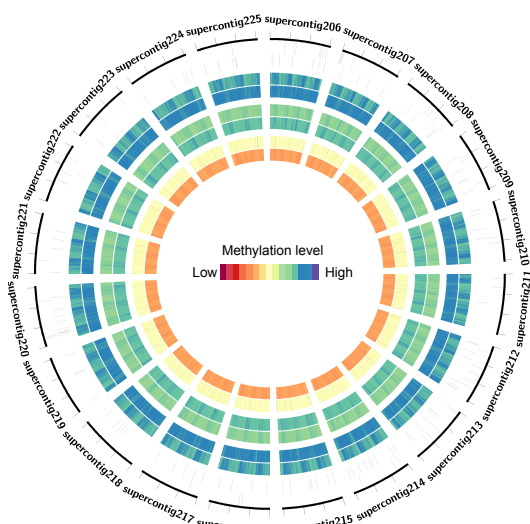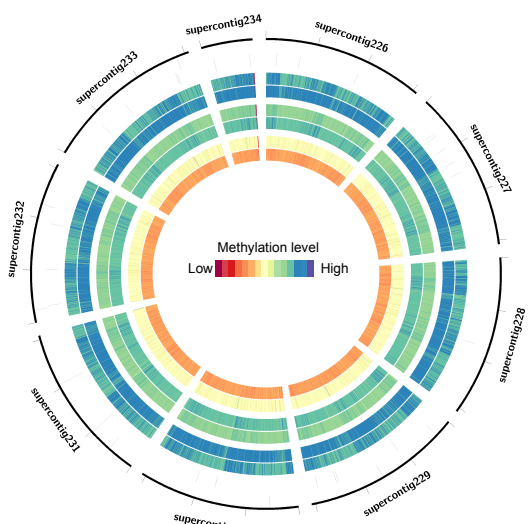

Supplement: pnas.1618019113.sd01.pdf [file pnas.1618019113.sd01.pdf]
